# Supplementary material
Source: Springer Nature journal article supplement (https://www.springermedizin.de/resource/supplementary/12913_2013_2856_MOESM2_ESM.pdf/9531684)
Supplement: MOESM2 [file 9531684]

Health condition  
(disorder or disease)

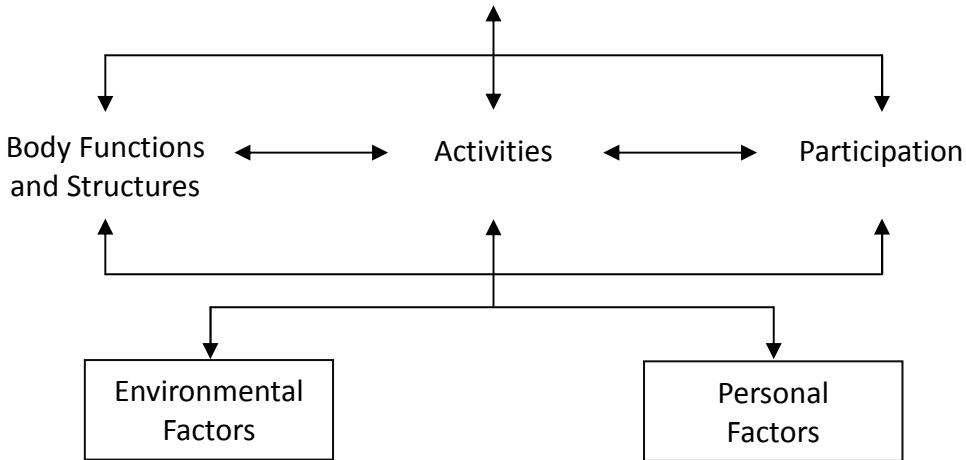

Body Functions  
and Structures

Activities

Participation

Environmental  
Factors

Personal  
Factors
